# Supplementary material
Source: PubMed Central journal article supplement (PMC4038149)
Supplement: icb2013113x1.pdf [file icb2013113x1.pdf]

Supplementary Figure 1

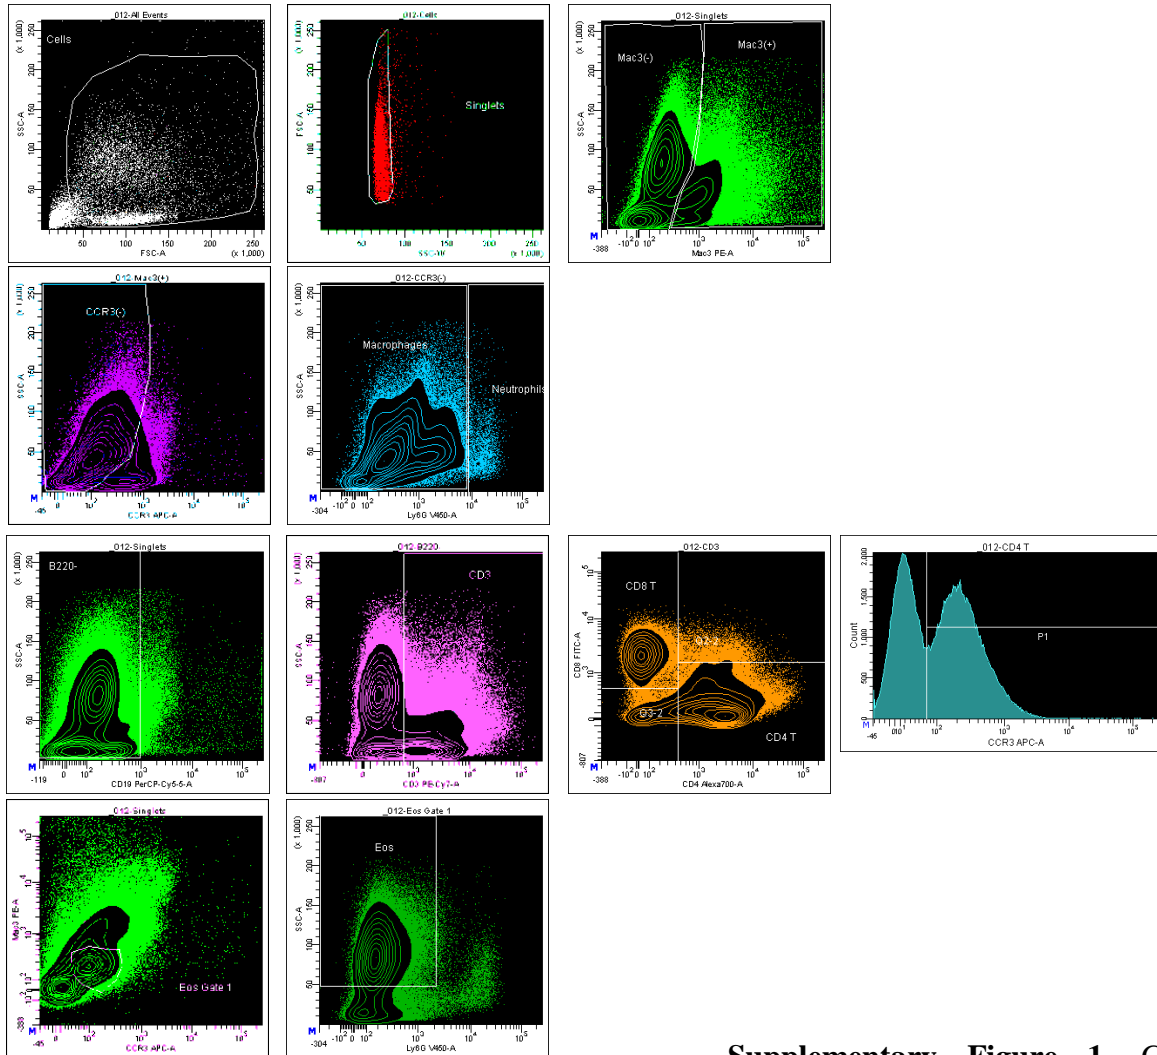

Tube: \_012

| Population  | #Events   | %Parent | %Total |
|-------------|-----------|---------|--------|
| All Events  | 1,108,750 | ###     | 100.0  |
| Cells       | 643,214   | 58.0    | 58.0   |
| Singlets    | 581,000   | 90.3    | 52.4   |
| Mac3(-)     | 456,817   | 78.6    | 41.2   |
| Eosinophils | 223       | 0.0     | 0.0    |
| Mac3(+)     | 119,102   | 20.5    | 10.7   |
| CCR3(-)     | 95,463    | 80.2    | 8.6    |
| Macrophages | 92,818    | 97.2    | 8.4    |
| Neutrophils | 2,532     | 2.7     | 0.2    |
| B220-       | 567,901   | 97.7    | 51.2   |
| CD3         | 229,253   | 40.4    | 20.7   |
| CD8 T       | 61,563    | 26.9    | 5.6    |
| Q2-2        | 6,420     | 2.8     | 0.6    |
| Q3-2        | 23,230    | 10.1    | 2.1    |
| CD4 T       | 138,040   | 60.2    | 12.5   |
| P1          | 80,533    | 58.3    | 7.3    |
| Eos Gate 1  | 224,227   | 38.6    | 20.2   |
| Eos         | 182,409   | 81.4    | 16.5   |

**Supplementary Figure 1.** Gating strategy used to identify cells in the BAL compartment. Cells were separated from debris and doublets were gated out. Eosinophils were identified based on high SSC, low Mac3 expression and high CCR3 expression. Lymphocytes were isolated based on low FSC and SSC and then based on CD3 expression followed by CD4 and CD8 markers. Macrophages were gated on high expression of Mac3 and low Ly6G while neutrophils were identified within the same scheme as the Ly6G high cells.

Supplementary Figure 2

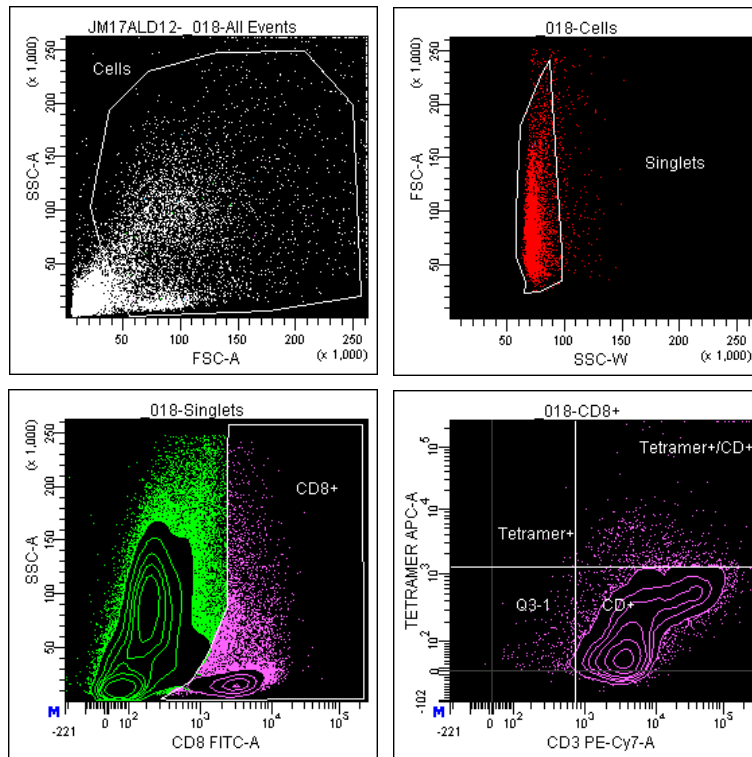

Tube: \_018

| Population    | #Events | %Parent | %Total |
|---------------|---------|---------|--------|
| All Events    | 302,540 | ###     | 100.0  |
| Cells         | 84,702  | 28.0    | 28.0   |
| Singlets      | 79,648  | 94.0    | 26.3   |
| CD8+          | 9,104   | 11.4    | 3.0    |
| Tetramer+     | 7       | 0.1     | 0.0    |
| Tetramer+/CD+ | 495     | 5.4     | 0.2    |
| Q3-1          | 222     | 2.4     | 0.1    |
| CD+           | 8,380   | 92.0    | 2.8    |

**Supplementary Figure 2.** Gating strategy used to identify influenza virus PB1-tetramer positive CD8 cells. Lymphocyte gate was drawn in the singlets population and cells that were double positive for CD8 and tetramer were quantified.
